# Supplementary material for: Carbon nanodots from orange peel waste as fluorescent probes for detecting nitrobenzene
Source: Royal Society of Chemistry journal article supplement (doi:10.1039/d3su00469d), 2024-01-01
Supplement: d3su00469d1.pdf [file d3su00469d1.pdf]

# Carbon Nanodots from Orange Peel Waste as Fluorescent Probe for Detecting Nitrobenzene

Cinzia Michenzi,<sup>1\*</sup> Anacleto Proietti,<sup>1</sup> Marco Rossi,<sup>1</sup> Claudia Espro,<sup>2</sup> Viviana Bessi,<sup>2</sup> Fabrizio Vetica,<sup>3</sup> Beatrice Simonis,<sup>4</sup> and Isabella Chiarotto<sup>1\*</sup>

<sup>1</sup> Department of Basic and Applied Sciences for Engineering (SBAI), Sapienza University of Rome, via Castro Laurenziano, 7, 00161 Rome (Italy); [cinzia.michenzi@uniroma1.it](mailto:cinzia.michenzi@uniroma1.it); [isabella.chiarotto@uniroma1.it](mailto:isabella.chiarotto@uniroma1.it); [anacleto.proietti@uniroma1.it](mailto:anacleto.proietti@uniroma1.it), [marco.rossi@uniroma1.it](mailto:marco.rossi@uniroma1.it)

<sup>2</sup> Dipartimento di Ingegneria, Università di Messina, Contrada di Dio-Vill. S. Agata, 98166 Messina - Italy; [claudia.espro@unime.it](mailto:claudia.espro@unime.it), [viviana.bessi@unime.it](mailto:viviana.bessi@unime.it)

<sup>3</sup> Department of Chemistry, Sapienza University of Rome, piazzale Aldo Moro, 5, 00185 Rome (Italy); [fabrizio.vetica@uniroma1.it](mailto:fabrizio.vetica@uniroma1.it)

<sup>4</sup> Institute of Biological Systems (ISB), Italian National Research Council (CNR), Sede secondaria di Roma - Meccanismi di Reazione, c/o Dipartimento di Chimica, Piazzale Aldo Moro 5, 00185 Rome, Italy; [beatrice.simonis@uniroma1.it](mailto:beatrice.simonis@uniroma1.it)

\* Correspondence: [cinzia.michenzi@uniroma1.it](mailto:cinzia.michenzi@uniroma1.it), [isabella.chiarotto@uniroma1.it](mailto:isabella.chiarotto@uniroma1.it)

## SUPPLEMENTARY MATERIALS

### Index

|                                                                                    |   |
|------------------------------------------------------------------------------------|---|
| Table S1. Dimensions obtained from the fitting of the D-band and G-band            | 1 |
| Figure S1. UV and Vis absorption.                                                  | 2 |
| Figure S2. Fluorescence values versus CDs concentration.                           | 2 |
| Figure S3. Fluorescence emission spectra of NACs and CDs.                          | 3 |
| Figure S4. Behavior of fluorescence emission with NB at high concentration of CDs. | 4 |
| Figure S5. Influence of pH on CDs stability.                                       | 4 |
| Figure S6. Fluorescence of NB at different NaCl concentrations.                    | 5 |
| Figure S7. The interaction time stability at different incubation time.            | 5 |
| Equation S1-S4. Process Efficient Metrics calculations.                            | 6 |

**Table S1.** Dimensions obtained from the fitting of the D-band and G-band

| Model           | Lorentz                                                              |                     |
|-----------------|----------------------------------------------------------------------|---------------------|
| Equation        | $y = y_0 + (2 \cdot A / \pi) \cdot (w / (4 \cdot x - x_c)^2 + w^2))$ |                     |
| Plot            | Fit Peak 1                                                           | Fit Peak 2          |
| y0              | -0.2231 ± 0.014                                                      | -0.2231 ± 0.014     |
| xc              | 1307.49052 ± 1,26291                                                 | 1571.7513 ± 0.41097 |
| w               | 154.17527 ± 6.11219                                                  | 126.75996 ± 2.30487 |
| A               | 106.27216 ± 5.88645                                                  | 239.85245 ± 5.74237 |
| Reduced Chi-Sqr | 0.00144                                                              |                     |
| R-Square (COD)  | 0.98338                                                              |                     |
| Adj. R-Square   | 0.98304                                                              |                     |

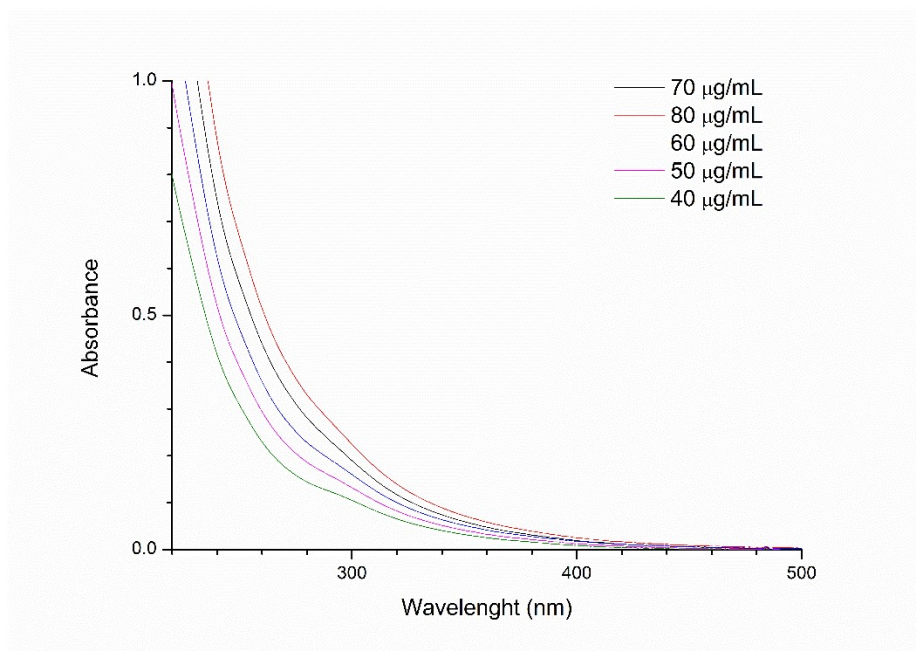

**Figure S1.** UV and Vis absorption.

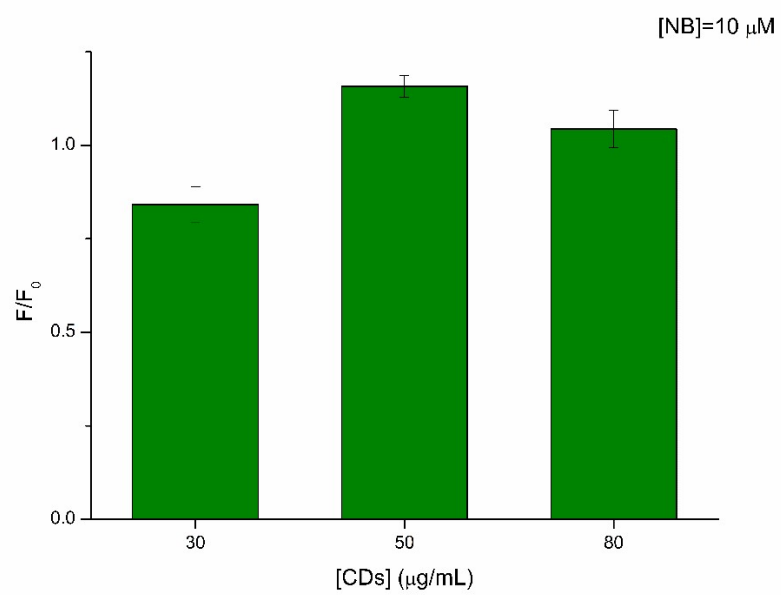

**Figure S2.** Fluorescence values versus CDs concentration

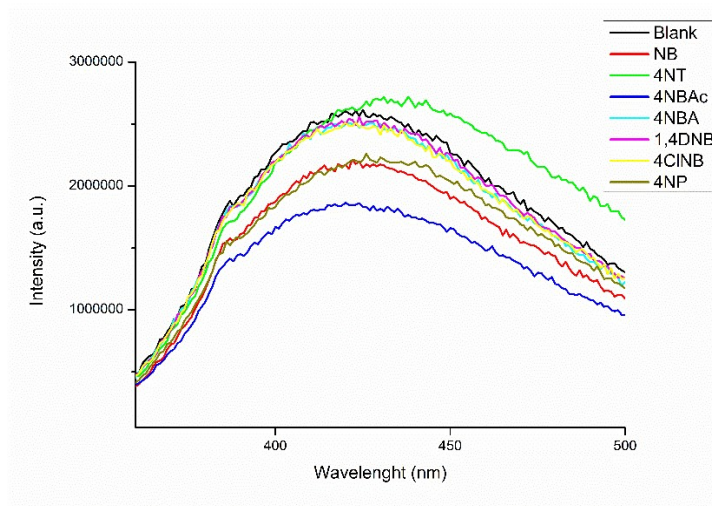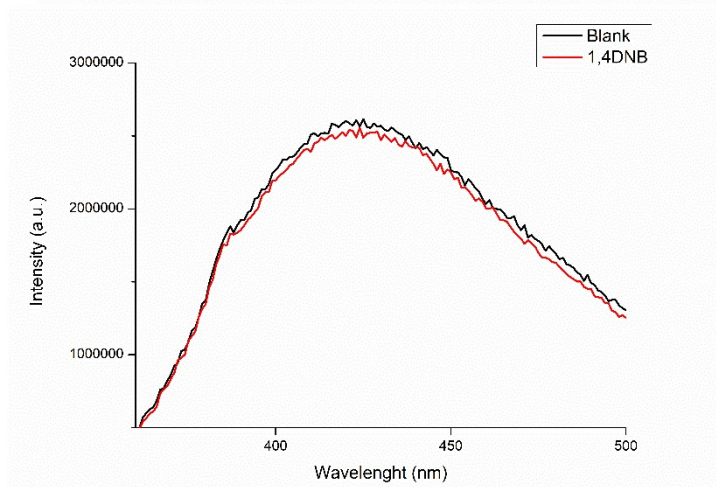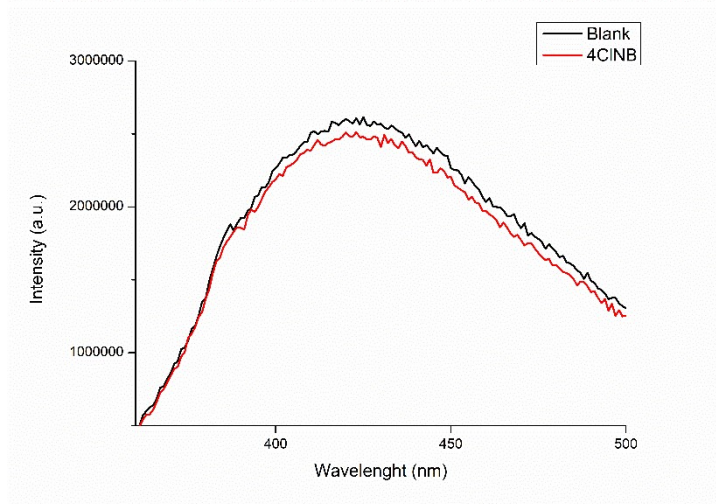

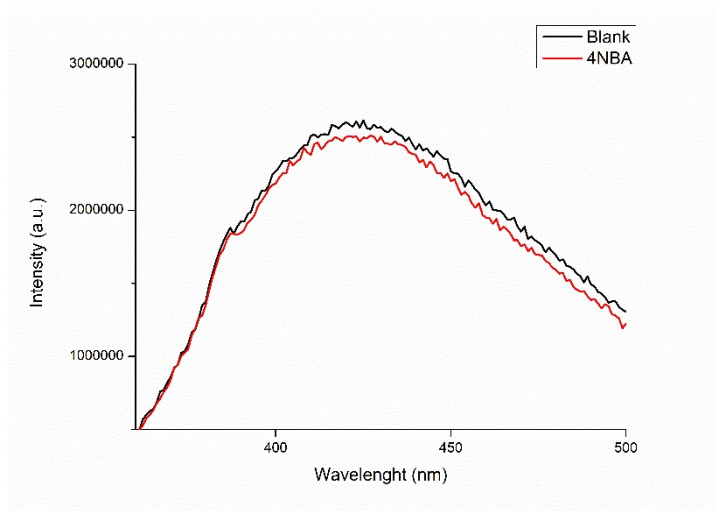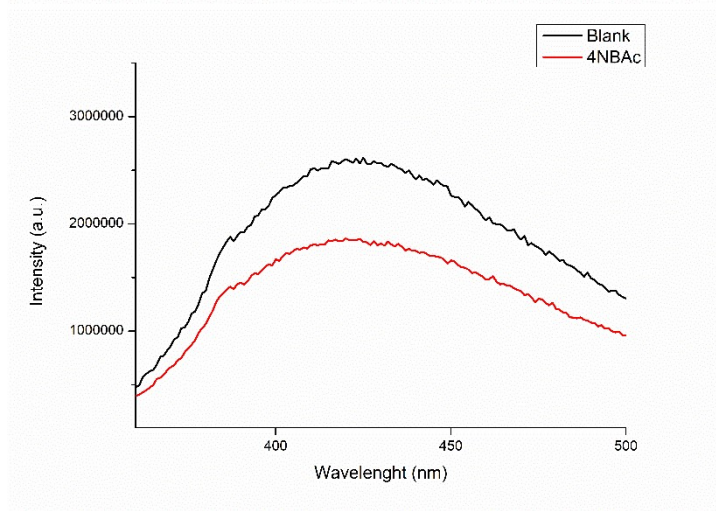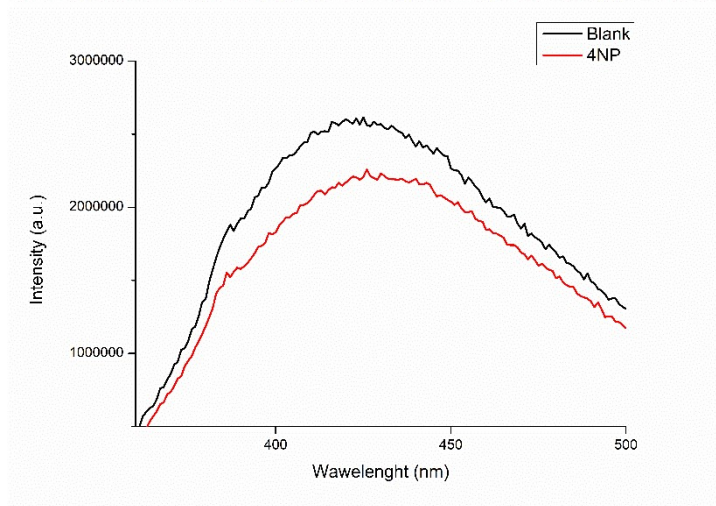

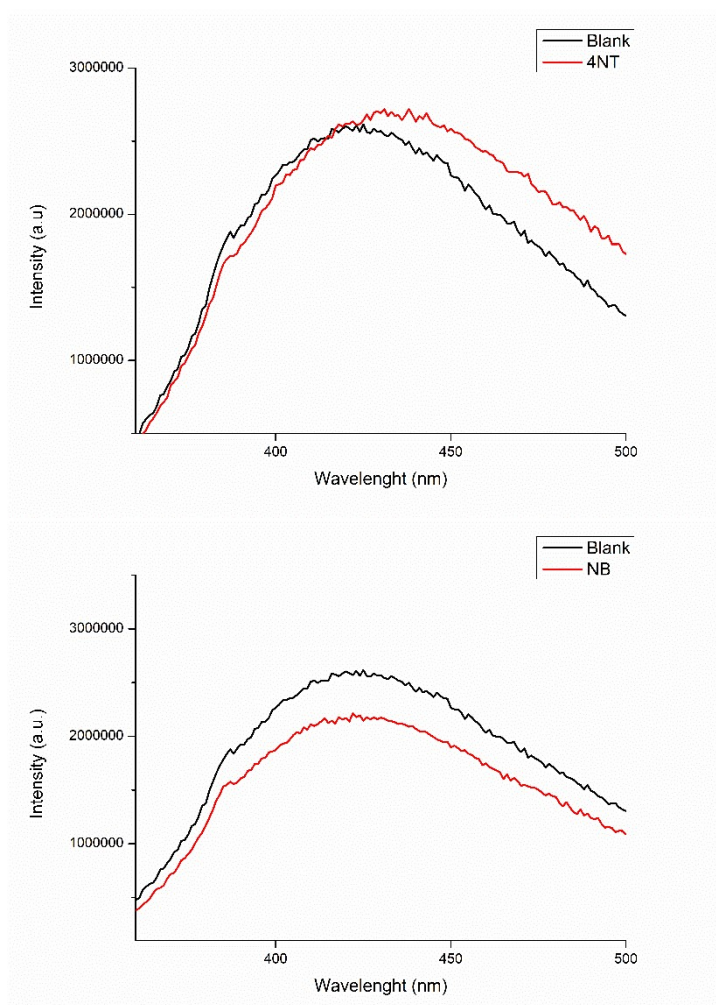

**Figure S3.** Fluorescence emission spectra of different NACs (10  $\mu\text{M}$ ) and CDs (30  $\mu\text{g/mL}$ ).

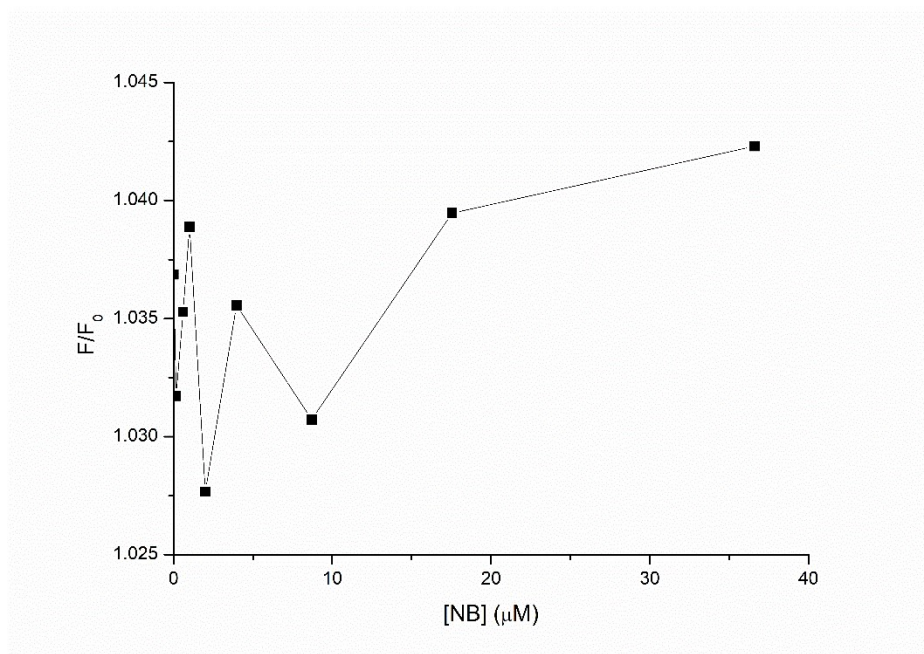

**Figure S4.** Influence of the PL emission intensity of aqueous CDs solutions (80.0  $\mu\text{g/mL}$ ) at different concentrations of NB.

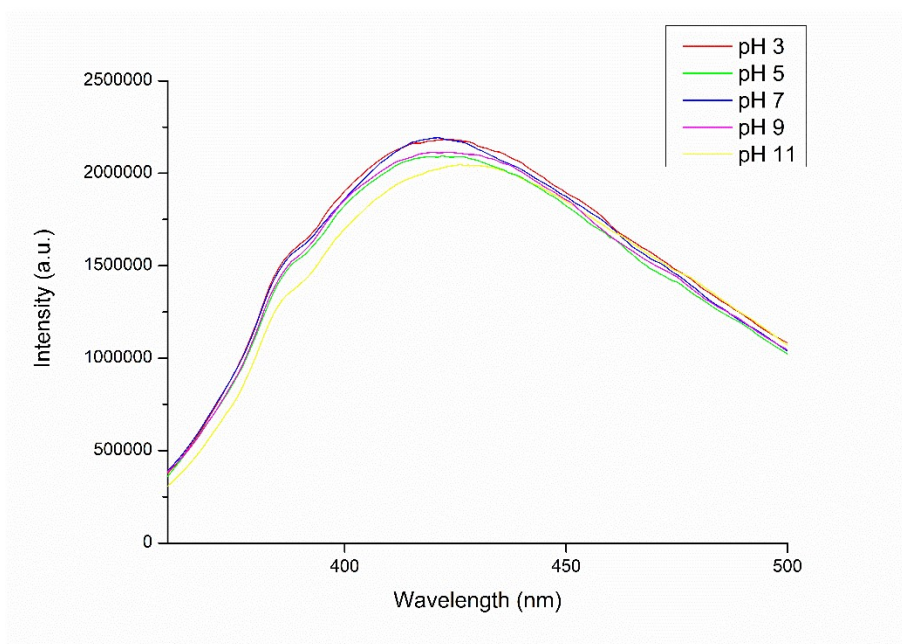

**Figure S5.** Influence of pH on CDs stability.

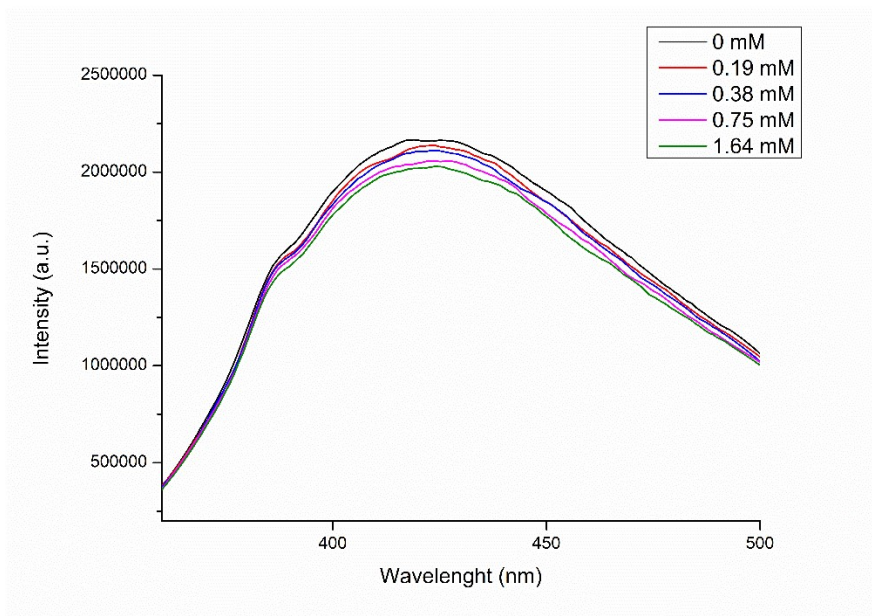

**Figure S6.** Fluorescence of NB at different NaCl concentrations.

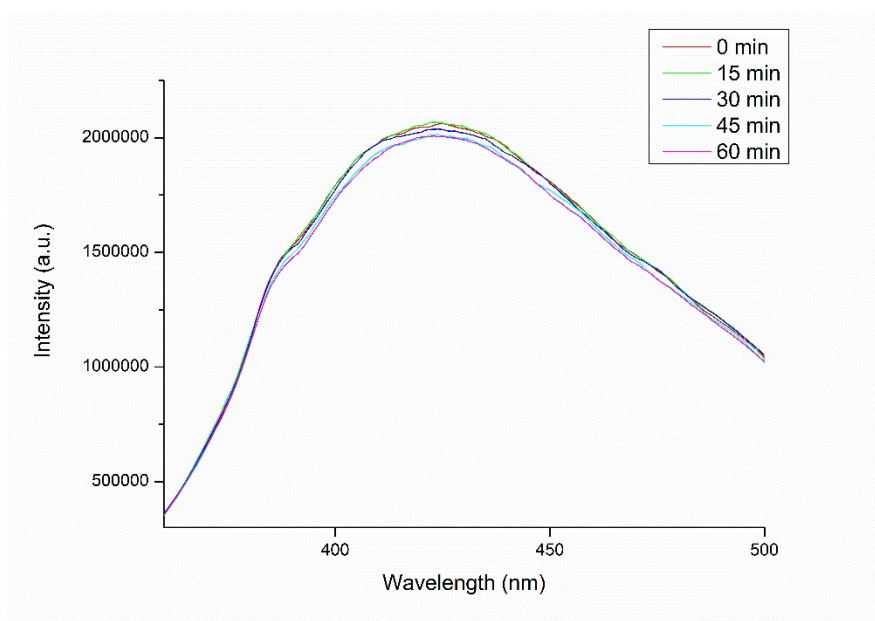

**Figure S7.**The interaction time stability at different incubation time: fluorescence intensity of CDs in the presence of NB.

$$MI = \frac{\Sigma_m(\text{Input Materials})}{m(\text{Product})} = \frac{0.303 + 0.75}{0.113} = 9 \quad (\text{S1})$$

$$MP = \frac{m(\text{Product}) * 100}{\Sigma_m(\text{Input Materials})} = \frac{0.113 * 0.100}{0.303 + 0.75} = 11\% \quad (\text{S2})$$

$$RME = \frac{m(\text{Product}) * 100}{\Sigma_m(\text{Raw Materials})} = \frac{0.113 * 0.100}{0.303} = 37\% \quad (\text{S3})$$

$$E - \text{Factor} = \frac{\Sigma_m(\text{Input Materials}) - m(\text{Product})}{m(\text{Product})} = \frac{(0.303 + 0.75) - 0.113}{0.113} = 8 \quad (\text{S4})$$

**Equations S1-S4.** Process Efficient Metrics: All the complete equations (1-4) with the relative calculation.
